# Supplementary material
Source: Research Square preprint supplement (doi:10.21203/rs.3.rs-8954939/v1)
Supplement: Supplementary file 1 [file 090813fa09b078bf7d6f5cfa.docx]

## Appendix A:

## Interview guide for **semi-structured** interviews

The interview guide in this study was developed for this study and has not previously been published elsewhere. Due to the nature of semi‑structured interviews, the interview guide was not followed verbatim. The questions in the guide should therefore be regarded as indicative only and not as a blueprint for the questions that were actually asked.

*General information communicated orally to all participants before commencing the interview:*

The interview aims to investigate what it means to live with rUTIs, as a young woman between 18 and before menopause. I will therefore be asking you questions, where you should answer as well as you can, and if anything comes up or if you would like to add or elaborate on something along the way, please do so. It is only about what you feel and which experiences you have had, so there are no ‘right’ and ‘wrong’ questions, and you are very welcome to tell me about experiences you have had. You should therefore think of this interview as a conversation where I am interested and curious about everything related to suffering from recurrent urinary tract infections.

So try to push aside the fact that I am a doctor and a researcher and just see it as an opportunity to talk about your experiences.

The interview will be anonymised, which means that it will not be possible to find out that it is precisely you who is being interviewed. What you share with me will therefore not be traceable back to you, so you can tell me anything from good to less good things regarding your experiences.

The interview, together with other interviews with women who also have rUTIs, will end up being made into an article that will be published in a journal.

**Introductory questions**

Can you tell me how long you have suffered from rUTIs?

Prompt:

- When did it start?

Can you tell me a bit about what it does to your everyday life and your life in general to have urinary tract infection again and again?

**The significance of living with recurrent urinary tract infections:**

Social life?

Do you experience that it limits you in your everyday life, in relation to your social relationships?

Prompts:

- Do you sometimes cancel plans when you have urinary tract infections?
- Do you have a steady partner?
- Does it have any significance in relation to your/your partner’s sex life?

If yes:

Can you, or would you like to, elaborate on this or give some examples of how it affects you?

- Do you talk to your partner about it?
- Do you meet understanding from your partner?
- Do you talk to your doctor about this?
- Do you meet understanding from your doctor?
- Do you talk to anyone else about this?

Physical health?

Can you try to describe how you feel in your body when you have a urinary tract infection?

Prompts:

Here I am thinking of the physical symptoms you experience in connection with a urinary tract infection?

- Are the symptoms always the same?
- How severe are your symptoms, if you were to place the different symptoms on a scale from 1–10, where 10 is the worst imaginable and 1 is very mild symptoms?
- Are there things you physically cannot do or avoid doing when you have a urinary tract infection?

Prompts:

- In relation to your work: do you have to call in sick, or what do you tell your workplace?
- In relation to physical activity: do you have any hobbies? Do you engage in any kind of sport? Can you do this when you have a urinary tract infection?

Emotional significance?

Does it affect your mood when you have a urinary tract infection?

If yes:

- How, and what do you experience as the most frustrating part of suffering from recurrent urinary tract infections?

When you do not have a urinary tract infection, do you fear the next one, or is it only when the symptoms begin to appear that you think about it?

If yes:

- How?

Significance over time?

If you look back in time, have your urinary tract infections caused challenges other than they do today?

- Has, for example, changing jobs made any difference?
- Have you had a new doctor along the way?
- Social relationships (boyfriend?)

**How others perceive urinary tract infections**

How do you generally experience that the illness is perceived?

Prompts:

- How do you experience that your social circle perceives the illness?
- How do you experience that others who also struggle with the illness perceive it?
- Do you have an impression that people in society in general know what the illness “recurrent urinary tract infection” is?

Do you talk to anyone in your social circle about your recurrences?

If yes:

- What do you ‘use’ them for?
- Support/sparring?
- Information
- Other?

If no:

- Why not?

Do you experience that it is embarrassing or that it can feel taboo to talk about the illness in your friend group/social circle?

If yes:

- Why?

If no:

- Do you think this is due to yourself and your own perception, or what do you think is the reason for this?

**Own understanding and perception**

Do you have an explanation yourself for why you think you have many urinary tract infections?

Prompts:

- Do you have an obvious reason for why it is precisely you who suffer from recurrent urinary tract infections?
- Do you have any thoughts about how it affects you as a person to suffer from this illness?

Have you always had many urinary tract infections?

If no:

- When did it start?

If yes:

- Why do you think it is precisely you who suffer from recurrent urinary tract infections?

**Seeking medical care / Relationship with your GP / guidance from your GP**

Relationship with your own doctor and seeking healthcare

Can you try to tell me about your relationship with your own doctor?

Prompts:

- Can you give some examples of what has had significance for your relationship?
- Do you go to the doctor when you experience symptoms of urinary tract infection?

If yes:

Do you feel helped?

- Can you try to describe a consultation you remember, where you went to the doctor with your urinary tract infection? What was done and said?
- Do you always get an appointment with your own doctor when you have a urinary tract infection?
- Is it sometimes a nurse?
- What do you prefer?

If no:

- Why do you not go to your own doctor?
- What do you do instead?

Knowledge from your doctor in connection with recurrent urinary tract infections

How do you experience that your doctor has helped you when you have been in contact with him/her regarding your recurrent urinary tract infections?

Prompts:

- Can you try to describe how the last consultation with your doctor was, and what he/she did to help you? (if this cannot be remembered, then just an occasion the interviewee can remember)
- Have you experienced that your doctor has investigated how he/she can help you while you were sitting together?
- Have you been given any material with information?
- Do you generally experience that your doctor wants to help you?

Do you experience that your doctor feels he/she is able to give you the necessary guidance?

If yes:

- Can you put some words to or give some examples of why you think so?

If no:

- Why not? What could your doctor do for you to feel you were getting the necessary guidance?

Do you think your doctor knows enough about preventive treatment of recurrent urinary tract infections?

If yes:

- What do you think is the reason that your doctor has so much knowledge in this area?

If no:

- How has the doctor expressed that he/she did not know about preventive treatment of recurrent urinary tract infections?

If you were to receive the best possible help from your doctor, do you have an idea of what it should include?

Attitude to alternative/non‑conventional treatment methods from your doctor?

What do you experience your doctor’s attitude to be towards alternative treatment methods that can be used against urinary tract infection?

Have you discussed preventive treatment?

If no:

- Why do you think you have not?

If yes:

- Can you recall whether you have discussed preventive measures, and what your doctor’s advice was in that case?

Examples (not mentioned):

- Antibiotics
- Cranberries
- Acupuncture
- Dietary supplements, such as D‑mannose, Vitamin D
- Herbal medicine, such as cranberry products
- Vaccines
- Probiotics
- Hiprex
- Chinese herbal medicine
- Behavioural changes: increased fluid intake, urinating after sex, or other advice

Has your doctor’s attitude/advice about non‑antibiotic preventive treatment influenced your choice of prevention?

Understanding of what it means to suffer from recurrent urinary tract infections

Do you experience that your doctor understands the significance of having recurrent urinary tract infections?

Prompts:

If no:

- Can you give an example of why you feel that way?

If yes:

- Can you give an example of why you feel that way?

Experience of preconceptions about this illness and its cause from your doctor?

Do you experience that your doctor has an opinion or a preconception about this illness?

If yes:

- Can you give some concrete examples of how this is expressed?

If no:

- Can you elaborate on why you do not feel that way?

Prompt:

- Is it a feeling you have, or is it because your doctor has said something specific that makes you answer this?
- Do you think your doctor knows/has an idea of why it is precisely you who has so many urinary tract infections?
- Do you think the doctor has enough knowledge about urinary tract infections and knows what he/she should do?

Expectations to your doctor?

Do you have an expectation of what your doctor should do when you go to him/her?

**Your knowledge about preventive treatment**

Have you tried any preventive methods to prevent urinary tract infections?

If no:

- Why do you think you have not?

If yes:

- Which preventive measures have you tried?

Examples (not mentioned):

- Antibiotics
- Vaccines
- Haiprix
- Herbal medicine
- Cranberries
- Behavioural changes
- Other

In what context did you try these?

Can you tell me about a specific episode where you used something preventive that you think worked?

Prompts:

- Why did you choose these in particular?
- Where did you hear about the preventive method?

Could you imagine trying other preventive treatments?

Can you think of any preventive method you have tried that did not work?

What is most important to you regarding your choice of preventive treatment?

Prompts:

- Is it important that research shows something works
- Is it more important to you if you hear that some women think something works?
- Or is it something entirely different?

The best possible guidance on preventive methods?

Do you have any ideas about how doctors can best handle and guide prevention?

Prompt:

- What should such a conversation include?

**Knowledge about antibiotic resistance development**

Introductory to the following topic:

*Now I would like to talk a little with you about your knowledge of antibiotic resistance. If you have nothing to say or do not feel you know what to answer, that is completely fine. Again, there are no right or wrong answers.*

- If I ask you about antibiotic resistance, what do you think of?
- Does the risk of antibiotic resistance matter in relation to which treatment you choose?

Prompts:

- Is it something you think of?
- Do you think about it in relation to the treatment your doctor offers / you decide to take?
- Has your doctor expressed to you that it is something that is important to him/her when making decisions about treatment?

**Information/searching for information about prevention**

Searching for information:

Have you looked for information about the illness and the various preventive treatment options anywhere?

If no:

- Why not?

If yes:

- Where do you find information about preventive treatment?

(Examples that may be mentioned)

- Your doctor
- Other clinics/departments
- Alternative practitioners
- Internet
- Social network
- Patient groups
- Information material handed out at the pharmacy/doctor/hospital/campaigns/research projects

Where do you feel you have received the best help to know what you can do regarding prevention of this illness?

Sufficient information:

Do you experience receiving/having sufficient knowledge about preventive treatment?

If no:

- Do you think there is generally a lack of knowledge about preventive treatment of recurrent urinary tract infections?

If yes:

- What has been the decisive factor for you in feeling well informed?

Information sparring with your doctor:

Do you discuss your knowledge about preventive treatment with your doctor?

If yes:

- How do you experience that your doctor relates to your knowledge?

If no:

- Why not?
