# Supplementary material
Source: Research Square preprint supplement (doi:10.21203/rs.3.rs-8954939/v1)
Supplement: Supplementary file 2 [file c548f5b891099c9d6dce4b58.docx]

## Appendix A

### Methodological considerations:

The sample of women in this study was purposively selected to ensure access to the intended knowledge. Recruitment was conducted through social media platforms, based on the assumption that this approach would yield a more heterogeneous sample with respect to experiences of managing rUTIs in a primary health care setting. In particular, this strategy allowed for the inclusion of women who did not necessarily consult their general practitioner for this condition. Additionally, the age range of the target sample was considered well suited to recruitment via social media.

We acknowledge that this recruitment strategy may have excluded certain groups, including women without access to social media and women who do not engage with content on these platforms. Furthermore, we recognize that the women who chose to participate may represent a group more severely affected by rUTIs and therefore may be more motivated to engage in a voluntary research studies. Moreover, the women included in the study may constitute a selected group that is potentially more resourceful than the broader population, which may render our sample indicative of a polarized group.
